# Supplementary material
Source: PubMed Central journal article supplement (PMC2715484)
Supplement: 0903852106_0903852106SI.pdf [file 0903852106_0903852106SI.pdf]

# Supporting Information

Depontieu et al. 10.1073/pnas.0903852106

## SI Materials and Methods

**Cultured Cell Lines.** The cultured plastic-adherent melanoma lines 1363-mel, 2048-mel, 1558-mel, 1102-mel, 397-mel, and 1087-mel were initiated from enzymatic digests of metastatic lesions. The EBV-B cell lines 1363-EBV, 2048-EBV, 1558-EBV, 1102-EBV, and 1087-EBV were generated from PBMCs according to standard methods and were maintained as suspension cultures. The MCF7 breast cancer cell line and LoVo, a colon cancer cell line, were obtained from the American Type Culture Collection. The 293 HEK cells expressing HLA-DR $\beta$ 1\*0101 were generated as described previously (1). All cell lines were maintained at 37 °C, 5% CO<sub>2</sub> in medium consisting of RPMI 1640 plus 10% heat-inactivated FCS, 2 mM L-glutamine, 10 mM Hepes buffer, and antibiotics. Cultures were certified to be free of *Mycoplasma* contamination by PCR.

**Isolation of HLA-DR-Associated Peptides.** Cells (total number,  $0.3 \times 10^9$  to  $1.2 \times 10^9$  per cell line) were lysed in a solution of 20 mM Tris-HCl, pH 8.0; 150 mM NaCl with 1% CHAPS; 1 mM PMSF; 5  $\mu$ g/mL aprotinin; 10  $\mu$ g/mL leupeptin; 10  $\mu$ g/mL pepstatin A; and 1:100 dilutions of phosphatase inhibitor cocktails I and II (Sigma-Aldrich), to prevent potential dephosphorylation of peptides during extraction. The lysate was centrifugated and then run over an Econocolumn (Bio-Rad) containing the pan-HLA-DR-specific mAb L243 bound to recombinant protein A fastflow Sepharose beads (Amersham Pharmacia Biotech). After overnight incubation at 4 °C, peptides were eluted from HLA-DR molecules with 10% acetic acid (HOAc) and separated by using

a 10-kDa cutoff ULTRAFREE-MC filter (Millipore). Extracts were stored at  $-80$  °C.

**Phosphopeptide Enrichment.** Samples were taken to dryness, reconstituted in 20–30  $\mu$ L of 1:1:1 acetonitrile to methanol to aqueous acetic acid (0.01%), loaded at 1  $\mu$ L/min onto an activated Fe<sup>3+</sup>-immobilized metal-affinity chromatography column (360- $\mu$ m o.d. and 150- $\mu$ m i.d.; Polymicro Technologies) packed with 7–8 cm of POROS 20 MC packing material (PerSeptive Biosystems) and eluted with 12  $\mu$ L of 50 mM ascorbic acid in 0.1% HOAc (Sigma-Aldrich) onto a microcapillary precolumn (360- $\mu$ m o.d. and 75- $\mu$ m i.d.) containing 5 cm of C18 irregular reverse-phase packing material (5- to 20- $\mu$ m particles; YMC).

**Peptides.** Peptides used in this study were synthesized with Fmoc chemistry, isolated by HPLC to >90% purity, and validated with mass spectrometry (Global Peptides and Pi Proteomics). Peptides included: B-Raf<sub>586–614</sub> V600E, (B-Raf mut; EDLTVKIGDFGLATEKSRWSGSHQFEQLS); B-Raf mut pT599 (pB-Raf mut; EDLTVKIGDFGLA[pT]EKSRWSGSHQFEQLS); wild-type B-Raf<sub>586–614</sub> (B-Raf wt; EDLTVKIGDFGLATVKSRWSGSHQFEQLS); B-Raf wt pT599 (pB-Raf wt; EDLTVKIGDFGLA[pT]VKSRWSGSHQFEQLS); MART<sub>100–111</sub> pS108 (pMART-1; Table 1); tensin-3<sub>1433–1445</sub> pS1441 (pTensin-3; Table 1); influenza HA<sub>307–319</sub> (PKYVKQNTLKLAT); and mutant triosephosphate isomerase (TPI<sub>26–38</sub> T28I or TPImut; IGILNAAKVPADT).

1. Wang RF, Wang X, Atwood AC, Topalian SL, Rosenberg SA (1999) Cloning genes encoding MHC class II-restricted antigens: Mutated CDC27 as a tumor antigen. *Science* 284:1351–1354.

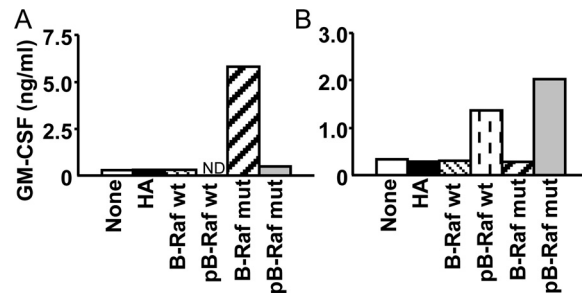

**Fig. S1.** CD4<sup>+</sup> T cells discriminate the presence of a phosphate moiety on candidate B-Raf peptides. B-Raf mut-specific CD4<sup>+</sup> T cell cultures were generated from the PBMCs of melanoma patients whose tumors harbored B-Raf mut. T cells raised against candidate B-Raf mut (A) or B-Raf mut<sup>P1599</sup> (pB-Raf mut; B) peptides were assessed for reactivity after an overnight coculture with peptide-pulsed APCs. GM-CSF secretion from T cells was measured by ELISA. ND, not done.

| Patient No. | HLA-DR genotype                          | Mel                                                                                | EBV                                                                                 |
|-------------|------------------------------------------|------------------------------------------------------------------------------------|-------------------------------------------------------------------------------------|
| 1363        | $\beta 1^*0101$                          | 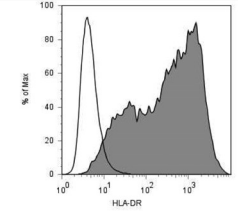 |  |
| 2048        | $\beta 1^*0101, 0404$<br>$\beta 4^*0103$ |  |  |

**Fig. S2.** HLA-DR expression on melanoma and EBV-B cells used for phosphopeptide isolation. Cells were analyzed by flow cytometry for expression of HLA-DR (mAb L243, isotype IgG2a). HLA-DR expression is shown in solid gray, and isotype controls appear in open field.

**Table S1. Characteristics of HLA-DR-associated phosphopeptides selectively expressed by EBV-transformed B cells**

| Source protein                                        | Location*                      | Phosphopeptide†                                                   | 1363-EBV | 2048-EBV         | Known phosphosite (score)‡ |
|-------------------------------------------------------|--------------------------------|-------------------------------------------------------------------|----------|------------------|----------------------------|
| <b>1363-EBV and 2048-EBV</b>                          |                                |                                                                   |          |                  |                            |
| B lymphocyte antigen CD20                             | PM                             | 25SGPKPLFRRMpSSLVGP <sup>T</sup> Q <sub>42</sub>                  | –        | + <sup>§</sup>   | N (0.945)                  |
|                                                       |                                | 26GPKPLFRRMpSS <sub>36</sub>                                      | –        | + <sup>§</sup>   |                            |
|                                                       |                                | 26GPKPLFRRMpSSL <sub>37</sub>                                     | –        | + <sup>§</sup>   |                            |
|                                                       |                                | 26GPKPLFRRMpSSLV <sub>38</sub>                                    | –        | + <sup>§</sup>   |                            |
|                                                       |                                | 26GPKPLFRRMpSSLVG <sub>39</sub>                                   | ++       | ++ <sup>§</sup>  |                            |
|                                                       |                                | 26GPKPLFRRMpSSLVGP <sub>40</sub>                                  | ++       | +++ <sup>§</sup> |                            |
|                                                       |                                | 26GPKPLFRRMpSSLVGP <sup>T</sup> <sub>41</sub>                     | ++       | +++ <sup>§</sup> |                            |
|                                                       |                                | 26GPKPLFRRMpSSLVGP <sup>T</sup> Q <sub>42</sub>                   | ++       | +++ <sup>§</sup> |                            |
|                                                       |                                | 26GPKPLFRRMpSSLVGP <sup>T</sup> QS <sub>43</sub>                  | –        | + <sup>§</sup>   |                            |
| Lymphoid-restricted membrane protein                  | ERM                            | 130ApSPTIEAQGTSPAHDN <sub>145</sub>                               | –        | ++               | N (0.991)                  |
|                                                       |                                | 130ApSPTIEAQGTSPAHDN <sub>146</sub>                               | –        | +                |                            |
|                                                       |                                | 130ApSPTIEAQGTSPAHDN <sub>147</sub>                               | –        | ++               |                            |
|                                                       |                                | 402SSpSWRILGSKQSEHR <sub>417</sub>                                | +        | –                | N (0.994)                  |
| <b>1363-EBV alone</b>                                 |                                |                                                                   |          |                  |                            |
| ADAM 8                                                | PM                             | 758pSPFPVFPVYTRQAPKQVIK <sub>776</sub>                            | +        | –                | N (0.677)                  |
| B lymphocyte antigen CD19                             | PM                             | 328DPTRRFFVKVpTPPPGSGPQ <sub>345</sub>                            | +        | –                | N (0.238)                  |
| Germinal center B cell-expressed transcript 2 protein | C                              | 142/76RpSPDEYELLMPHRISSH <sub>159/93</sub>                        | +        | –                | N (0.998)                  |
|                                                       |                                | 143/77pSPDEYELLMPHRISSH <sub>159/93</sub>                         | +        | –                |                            |
|                                                       |                                | 143/77pSPDEYELLMPHRIPSSH <sub>159/93</sub>                        | +        | –                | N (0.737)                  |
|                                                       |                                | 149/83ELLMPHRIPSSH <sub>160/94</sub>                              | +        | –                |                            |
|                                                       |                                | 149/83ELLMPHRIPSSH <sub>L161/95</sub>                             | +        | –                |                            |
| Interleukin-2 receptor subunit-β                      | PM                             | 282TPDPSKFFS <sup>Q</sup> LpSSEHG <sup>D</sup> V <sub>300</sub>   | +        | –                | N (0.905)                  |
|                                                       |                                | 282pTPDPSKFFS <sup>Q</sup> LSSEHG <sup>D</sup> V <sub>301</sub>   | +        | –                | N (0.772)                  |
| Optineurin                                            | C/G                            | 473pSDFHAERAAREK <sub>484</sub>                                   | +        | –                | N (0.073)                  |
| Phosphoglycerate kinase 1                             | C                              | 203pSPERPLA <sup>L</sup> ILGGAKVADK <sub>220</sub>                | +        | –                | Y (0.997)                  |
|                                                       |                                | 203pSPERPLA <sup>L</sup> ILGGAKVADK <sup>I</sup> Q <sub>222</sub> | +        | –                |                            |
| Solute carrier family 12, member 6, isoform a         | PM                             | 1050TKDKYMASRGQAKpSMEG <sub>1067</sub>                            | +        | –                | N (0.993)                  |
| TNFAIP3-interacting protein 1                         | C/N                            | 559VPHHGFE <sup>D</sup> WpSQIR <sub>571</sub>                     | +        | –                | N (0.483)                  |
| Tumor necrosis factor receptor superfamily member 8   | PM                             | 513/50KIEKIpYIMKADTVIVG <sub>528/65</sub>                         | ++       | –                | N (0.771)                  |
|                                                       |                                | 514/51IEKIpYIMKADTVIVG <sub>528/65</sub>                          | +        | –                |                            |
| UPF0501 protein KIAA1430                              | UK                             | 136EESpSDDGKKY <sub>145</sub>                                     | +        | –                | Y (0.458)                  |
| Xenotropic and polytropic retrovirus receptor 1       | PM                             | 657KNRpSWKYN <sub>664</sub>                                       | +        | –                | N (0.995)                  |
|                                                       |                                | 657KNRpSWKYNQ <sub>665</sub>                                      | +        | –                |                            |
|                                                       |                                | 657KNRpSWKYNQSI <sup>L</sup> R <sub>670</sub>                     | +        | –                |                            |
|                                                       |                                | 657KNRpSWKYNQSI <sup>L</sup> SLRR <sub>672</sub>                  | ++       | –                |                            |
|                                                       |                                | 658NRpSWKYNQSI <sup>L</sup> R <sub>670</sub>                      | +        | –                |                            |
|                                                       |                                | 658NRpSWKYNQSI <sup>L</sup> SLRR <sub>672</sub>                   | +        | –                |                            |
|                                                       |                                | 659RpSWKYNQSI <sup>L</sup> SLRR <sub>672</sub>                    | ++       | –                |                            |
| <b>2048-EBV alone</b>                                 |                                |                                                                   |          |                  |                            |
| BCL2-associated transcription factor 1                | N                              | 653RRIDIpSPSTLR <sub>663</sub>                                    | –        | +                | N (0.970)                  |
|                                                       |                                | 653RRIDIpSPSTLR <sub>664</sub>                                    | –        | +                |                            |
| Caspase recruitment domain-containing protein 11      | C                              | 509RAKpSPISL <sub>517</sub>                                       | –        | +                | N (0.996)                  |
| Chromatin-modifying protein 1a                        | C/E/N                          | 49/177ESpSVRSQEDQLSR <sub>61/189</sub>                            | –        | +                | Y (0.986)                  |
|                                                       |                                | 49/177ESpSVRSQEDQLSR <sub>62/190</sub>                            | –        | ++               |                            |
| Interleukin-10 receptor-β chain                       | PM                             | 293DKLpSVIAEDSESGKQ <sub>307</sub>                                | –        | ++               | N (0.498)                  |
|                                                       |                                | 293DKLpSVIAEDSESGKQ <sub>308</sub>                                | –        | +                |                            |
|                                                       |                                | 293DKLpSVIAEDSESGKQNP <sub>309</sub>                              | –        | +                |                            |
|                                                       |                                | 293DKLpSVIAEDSESGKQNP <sub>310</sub>                              | –        | ++               |                            |
|                                                       |                                | 293DKLpSVIAEDSESGKQNP <sub>312</sub>                              | –        | +                |                            |
|                                                       |                                | 294KLpSVIAEDSESGKQ <sub>308</sub>                                 | –        | +                |                            |
|                                                       |                                | 294KLpSVIAEDSESGKQNP <sub>309</sub>                               | –        | ++               |                            |
|                                                       |                                | 294KLpSVIAEDSESGKQNP <sub>310</sub>                               | –        | +                |                            |
| NADH-ubiquinone oxidoreductase flavoprotein 3         | MTM                            | 88NLELSKFRMPQPSGRe <sup>p</sup> SPRH <sub>108</sub>               | –        | + <sup>§</sup>   | N (0.997)                  |
|                                                       |                                | 91LSKFRMPQPSGRe <sup>p</sup> SPRH <sub>108</sub>                  | –        | + <sup>§</sup>   |                            |
| Protein FAM40A                                        | N                              | 318PPLPESIKVIRNMRAPSPPA <sub>338</sub>                            | –        | ++ <sup>§</sup>  | Y (0.981)                  |
| Ras association domain-containing protein 6           | C                              | 184/152/140RTMpSEALVVRK <sub>194/162/150</sub>                    | –        | ++               | N (0.614)                  |
| SH2 domain containing 3C isoform 1                    | C <sup>¶</sup> /M <sup>¶</sup> | 80MPRPpSIKKAQNSQAAR <sub>96</sub>                                 | –        | + <sup>§</sup>   | N (0.997)                  |
| Tax1-binding protein 1, isoform 1 or 2                | C                              | 106THKGEIRGASTPPFRAP <sup>p</sup> SP <sub>125</sub>               | –        | +                | N (0.955/0.996)            |
|                                                       |                                | 107HKGEIRGASTPPFRAP <sup>p</sup> SP <sub>125</sub>                | –        | ++               |                            |
| UPF0492 protein C20orf94                              | UK                             | 391STIQNPSP <sup>T</sup> TK <sub>400</sub>                        | –        | +                | N (0.953)                  |

–, not detected; +, <6 copies per cell; ++, 6–50 copies per cell; +++, 51–140 copies per cell.

\*In the localization column: C, cytoplasm; E, endosome; ER, endoplasmic reticulum; ERM, endoplasmic reticulum membrane; G, Golgi; GM, Golgi membrane; M, membrane; MTM, mitochondrial membrane; N, nucleus; PM, plasma membrane; and UK, unknown.

†pS, pT, and pY correspond to serine, threonine, or tyrosine-associated phosphorylated residues, respectively. Italics indicate the exact site of phosphorylation could not be determined.

‡Phosphosites searched in the Phospho-ELM database [Diella F, Gould CM, Chica C, Via A, Gibson TJ (2008) *Nucleic Acids Res* 36:D240–D244]. Values in parentheses show the score from the NetPhos 2.0 Server [Viner NJ, Nelson CA, Deck B, Unanue ER (1996) *J Immunol* 156:2365–2368] indicating the probability for the site to be phosphorylated, scale 0–1.0. Higher scores indicate greater confidence in the prediction, with the designated binding threshold at 0.500. In cases of undefined phosphorylation sites (italicized), both scores are given.

§Peptides containing Met<sup>ox</sup>.

¶Hypothetical localization.

**Table S2. Characteristics of HLA-DR-associated phosphopeptides commonly expressed by melanoma and EBV-B cells**

| Source protein                            | Location* | Phosphopeptide†                                      | 1363-mel | 1363-EBV | 2048-mel | 2048-EBV | Known phosphosite (score)‡ |
|-------------------------------------------|-----------|------------------------------------------------------|----------|----------|----------|----------|----------------------------|
| Elongin A                                 | N§        | 122RSYpSPDHRQK <sub>131</sub>                        | –        | –        | ++       | nm       | Y (0.974)                  |
| Ferritin heavy chain                      | C         | 171FDKHTLGDpSDNES <sub>183</sub>                     | ++       | –        | ++       | nm       | Y (0.603)                  |
| Frizzled-6                                | PM        | 617EPApSPAAPsISRLSGEQVDGKG <sub>637</sub>            | –        | –        | –        | +        | N (0.240/0.951)            |
|                                           |           | 620SPAASISRLpSGEQVDGKG <sub>637</sub>                | +        | –        | –        | –        | N (0.996)                  |
|                                           |           | 623ASISRLpSGEQVDGKG <sub>637</sub>                   | ++       | –        | –        | –        |                            |
|                                           |           | 623ApSISRLpSGEQVDGKG <sub>637</sub>                  | ++       | –        | –        | –        | N (0.951 and 0.996)        |
|                                           |           | 623ApSISRLSGEQVDGKG <sub>637</sub>                   | ++       | –        | +        | –        | N (0.951)                  |
|                                           |           | 623ApSpSRLSGEQVDGKGQ <sub>638</sub>                  | –        | –        | +        | –        | N (0.951/0.141)            |
| Insulin like growth factor 2 receptor     | LM        | 2392TTKpSVKALSSLHG <sub>2404</sub>                   | –        | –        | +        | –        | N (0.673)                  |
|                                           |           | 2392TTKpSVKALSSLHGDD <sub>2406</sub>                 | –        | –        | ++       | –        |                            |
|                                           |           | 2392TTKpSVKALSSLHGDDQ <sub>2407</sub>                | –        | –        | ++       | –        |                            |
|                                           |           | 2392TTKpSVKALSSLHGDDQD <sub>2408</sub>               | –        | –        | ++       | nm       |                            |
|                                           |           | 2392TTKpSVKALSSLHGDDQDS <sub>2409</sub>              | –        | –        | +        | ++       |                            |
|                                           |           | 2393TKpSVKALSSLHGDD <sub>2406</sub>                  | –        | –        | +        | –        |                            |
|                                           |           | 2393TKpSVKALSSLHGDDQ <sub>2407</sub>                 | –        | –        | +        | nm       |                            |
|                                           |           | 2393TKpSVKALSSLHGDDQD <sub>2408</sub>                | –        | –        | +        | nm       |                            |
|                                           |           | 2394KpSVKALSSLHGDDQ <sub>2407</sub>                  | –        | –        | +        | –        |                            |
|                                           |           | 2394KpSVKALSSLHGDDQD <sub>2408</sub>                 | –        | –        | +        | nm       |                            |
|                                           |           | 2392TTKSVKALSSLHGDDQDpSED <sub>2411</sub>            | –        | –        | –        | +++      | Y (0.977)                  |
|                                           |           | 2392TTKSVKALSSLHGDDQDpSEDE <sub>2412</sub>           | –        | –        | –        | nm       |                            |
|                                           |           | 2394KSVKALSSLHGDDQDpSEDE <sub>2412</sub>             | –        | –        | –        | nm       |                            |
|                                           |           | 2476KLVSFDDpSDEDL <sub>2488</sub>                    | –        | –        | –        | nm       | N (0.996)                  |
| Lipolysis-stimulated lipoprotein receptor | PM        | 324/287/305APSTYAhLpSPAK <sub>335/398/316</sub>      | +        | –        | –        | –        | N (0.958)                  |
|                                           |           | 324/287/305APSTYAhLpSPAKTPPPP <sub>340/303/321</sub> | +        | ++       | –        | –        |                            |
| Plakophilin-4                             | PM        | 206NRAMRRVpSSVPSR <sub>218</sub>                     | –        | –        | +        | –        | N (0.996)                  |
|                                           |           | 206NRAMRRVpSSVPSRAQ <sub>220</sub>                   | –        | –        | +        | –        |                            |
|                                           |           | 278RPApSPpTAIRRIGSVTSRQT <sub>296</sub>              | –        | –        | –        | +        | Y (0.997)/ N (0.043)       |
| Sequestosome-1                            | N/C/E     | 332pSGGDDDWTHLSSKEVDPST <sub>350</sub>               | –        | +        | –        | –        | Y (0.991)                  |
|                                           |           | 332pSGGDDDWTHLSSKEVDPSTG <sub>351</sub>              | –        | ++       | –        | –        |                            |
|                                           |           | 332pSGGDDDWTHLSSKEVDPSTGE <sub>352</sub>             | –        | +        | –        | –        |                            |
|                                           |           | 332pSGGDDDWTHLSSKEVDPSTGEL <sub>353</sub>            | –        | +        | –        | –        |                            |
|                                           |           | 332pSGGDDDWTHLSSKEVDPSTGELQ <sub>354</sub>           | –        | +        | –        | –        |                            |
|                                           |           | 333GGDDDWTHLpSSKEVDPS <sub>349</sub>                 | ++       | –        | +        | –        | N (0.954)                  |
|                                           |           | 333GGDDDWTHLpSSKEVDPSTG <sub>351</sub>               | –        | –        | +        | –        |                            |
|                                           |           | 334GGDDDWTHLpSSKEVD <sub>347</sub>                   | –        | –        | +        | –        |                            |
|                                           |           | 334GGDDDWTHLpSSKEVDP <sub>348</sub>                  | –        | –        | ++       | –        |                            |
|                                           |           | 334GGDDDWTHLpSSKEVDPS <sub>349</sub>                 | +++      | –        | ++       | –        |                            |
|                                           |           | 334GGDDDWTHLpSSKEVDPST <sub>350</sub>                | –        | –        | +        | –        |                            |
|                                           |           | 334GGDDDWTHLpSSKEVDPSTG <sub>351</sub>               | +++      | +        | +        | –        |                            |
|                                           |           | 335DDDWTHLpSSKEVDPS <sub>349</sub>                   | ++       | +        | –        | –        |                            |
|                                           |           | 335DDDWTHLpSSKEVDPSTG <sub>351</sub>                 | –        | +        | –        | –        |                            |
|                                           |           | 336DDWTHLpSSKEVDPS <sub>349</sub>                    | ++       | –        | –        | –        |                            |
|                                           |           | 337DWTHLpSSKEVDPS <sub>349</sub>                     | ++       | –        | –        | –        |                            |
|                                           |           | 337DWTHLpSSKEVDPSTG <sub>351</sub>                   | ++       | –        | –        | –        |                            |
|                                           |           | 338WTHLpSSKEVDPS <sub>349</sub>                      | +++      | –        | –        | –        |                            |
|                                           |           | 338WTHLpSSKEVDPSTG <sub>351</sub>                    | ++       | nm       | –        | –        |                            |
| Sorting nexin-17                          | C/E       | 402GpTLRRSDSQAVK <sub>414</sub>                      | –        | –        | +        | +        | N (0.899)                  |
|                                           |           | 402GpTLRRSDSQAVKS <sub>415</sub>                     | –        | –        | +        | –        |                            |
|                                           |           | 402GpTLRRSDSQAVKSPP <sub>417</sub>                   | –        | –        | +        | –        |                            |
| UPF0555 protein KIAA0776                  | UK        | 783VLKSRKpSpSVTEE <sub>794</sub>                     | –        | –        | +        | ++       | N (0.990)/Y (0.997)        |

–, not detected; +, <6 copies per cell; ++, 6–50 copies per cell; +++, 51–140 copies per cell; and nm, not measured.

\*In the localization column: C, cytoplasm; E, endosome; LM, lysosome membrane; N, nucleus; NM, nuclear membrane; PM, plasma membrane; and UK, unknown.

†pS, pT, and pY correspond to serine, threonine, or tyrosine-associated phosphorylated residues, respectively. Italics indicate the exact site of phosphorylation could not be determined.

‡Phosphosites searched in the Phospho-ELM database [Diella F, Gould CM, Chica C, Via A, Gibson TJ (2008) *Nucleic Acids Res* 36:D240–D244]. Values in parentheses show the score from the NetPhos 2.0 Server [Viner NJ, Nelson CA, Deck B, Unanue ER (1996) *J Immunol* 156:2365–2368] indicating the probability for the site to be phosphorylated, scale 0–1.0. Higher scores indicate greater confidence in the prediction, with the designated binding threshold at 0.500. In cases of undefined phosphorylation sites (italicized), both scores are given.

§Hypothetical localization.

**Table S3. Characteristics of source proteins generating HLA-DR-restricted phosphopeptides**

| Source protein                                        | Accession number | Known phosphoprotein? | Function                       | Other names                                                                                                                                 |
|-------------------------------------------------------|------------------|-----------------------|--------------------------------|---------------------------------------------------------------------------------------------------------------------------------------------|
| ADAM 8                                                | P78325           | N                     | Cellular trafficking           | A disintegrin and metalloproteinase domain 8, Cell surface antigen MS2, CD156a                                                              |
| Amino-terminal enhancer of split                      | Q08117           | N                     | Transcriptional regulation     | GRG protein, Protein ESP1, Gp130-associated protein GAM                                                                                     |
| Ankyrin repeat domain-containing protein 54           | Q6NXT1           | Y                     | Unknown                        | NA                                                                                                                                          |
| Anoctamin-8                                           | Q9HCE9           | N                     | Ion transport                  | Transmembrane protein 16H                                                                                                                   |
| AP-3 complex subunit- $\Delta$ -1                     | O14617           | Y                     | Trafficking                    | Adapter-related protein complex 3 subunit- $\Delta$ -1, AP-3 complex subunit- $\Delta$ , $\Delta$ -adaptin                                  |
| BCL2-associated transcription factor 1                | A2RU75           | N                     | Transcription factor           | NA                                                                                                                                          |
| B lymphocyte antigen CD19                             | P15391           | Y                     | Receptor/signal transduction   | Differentiation antigen CD19, B lymphocyte surface antigen B4, Leu-12                                                                       |
| B lymphocyte antigen CD20                             | P11836           | Y                     | Receptor/signal transduction   | Membrane-spanning 4-domains subfamily A member 1, B lymphocyte surface antigen B1, Leu-16, Bp35                                             |
| Casein kinase II subunit- $\beta$                     | P67870           | Y                     | Signal transduction            | Phosvitin, G5a                                                                                                                              |
| Caspase recruitment domain-containing protein 11      | Q9BXL7           | N                     | Signal transduction            | CARD-containing MAGUK protein 3, Carma 1                                                                                                    |
| Chromatin-modifying protein 1a                        | Q9HD42           | N                     | Cell cycle/protein trafficking | Chromatin-modifying protein 1a, Vacuolar protein sorting-associated protein 46-1                                                            |
| Claudin-11                                            | O75508           | N                     | Cell adhesion                  | Oligodendrocyte-specific protein                                                                                                            |
| Elongin A                                             | Q14241           | Y                     | Transcriptional regulation     | Transcription elongation factor B polypeptide 3, RNA polymerase II transcription factor SIII subunit A1, SIII p110, Elongin 110-kDa subunit |
| Emerin                                                | P50402           | Y                     | Protein binding                | NA                                                                                                                                          |
| Ferritin heavy chain                                  | P02794           | Y                     | Ion storage                    | Cell proliferation-inducing gene 15 protein                                                                                                 |
| FLJ20689                                              | Q9H3M3           | N                     | Unknown                        | NA                                                                                                                                          |
| Frizzled-6                                            | O60353           | Y                     | Receptor/Signal transduction   | NA                                                                                                                                          |
| Germinal center B-cell-expressed transcript 2 protein | Q8N6F7           | Y                     | Signal transduction*           | Germinal center-associated lymphoma protein                                                                                                 |
| Insulin-like growth factor 2 receptor                 | P11717           | Y                     | Metabolism                     | Cation-independent mannose-6-phosphate receptor, M6P/IGF2 receptor, 300 kDa mannose 6-phosphate receptor, CD222                             |
| Insulin receptor substrate 2                          | Q9Y4H2           | Y                     | Receptor/signal transduction   | NA                                                                                                                                          |
| Interleukin 1 receptor accessory protein              | Q9NPH3           | N                     | Receptor/signal transduction   | NA                                                                                                                                          |
| Interleukin-2 receptor subunit- $\beta$               | P14784           | Y                     | Receptor/signal transduction   | High-affinity IL-2 receptor subunit- $\beta$ , P70-75, CD122                                                                                |
| Interleukin-10 receptor- $\beta$ chain                | Q08334           | N                     | Receptor/signal transduction   | IL-10R2, Cytokine receptor family 2 member 4, CDw210b                                                                                       |
| Lipolysis-stimulated lipoprotein receptor             | Q86X29           | Y                     | Receptor/metabolism            | NA                                                                                                                                          |
| LUC7-like isoform b                                   | Q53G47           | Y                     | Unknown                        | NA                                                                                                                                          |
| Lymphoid-restricted membrane protein                  | Q12912           | N                     | Metabolism                     | Protein Jaw1                                                                                                                                |
| Matrix-remodeling-associated protein 7                | P84157           | N                     | Unknown                        | Transmembrane anchor protein 1                                                                                                              |
| Melanoma antigen recognized by T cells 1              | Q16655           | N                     | Unknown                        | MART-1, Melan-A, Antigen SK29-AA, Antigen LB39-AA                                                                                           |

| Source protein                                          | Accession number | Known phosphoprotein? | Function                                | Other names                                                                                                                                                                                               |
|---------------------------------------------------------|------------------|-----------------------|-----------------------------------------|-----------------------------------------------------------------------------------------------------------------------------------------------------------------------------------------------------------|
| Membrane-associated progesterone receptor component 1   | O00264           | Y                     | Receptor                                | NA                                                                                                                                                                                                        |
| NADH-ubiquinone oxidoreductase flavoprotein 3           | P56181           | N                     | Metabolism                              | NADH-ubiquinone oxidoreductase 9-kDa subunit, Complex I-9kD, Renal carcinoma antigen NY-REN-4                                                                                                             |
| NF- $\kappa$ B inhibitor-interacting Ras-like protein 2 | Q9NYR9           | N                     | Signal regulation                       | I $\kappa$ B-interacting Ras-like protein 2                                                                                                                                                               |
| Optineurin                                              | Q96CV9           | Y                     | Signal transduction/protein trafficking | Optic neuropathy-inducing protein, E3-14.7K-interacting protein, FIP-2, Huntingtin-interacting protein L, Huntingtin yeast partner L, NEMO-related protein, Transcription factor IIIA-interacting protein |
| Phosphoglycerate kinase 1                               | P00558           | Y                     | Metabolism                              | Primer recognition protein 2, Cell migration-inducing gene 10 protein                                                                                                                                     |
| Plakophilin-4                                           | Q99569           | Y                     | Cell adhesion                           | p0071                                                                                                                                                                                                     |
| Probable fibrosin-1 long-transcript protein isoform 2   | Q9HAH7           | Y                     | Unknown                                 | NA                                                                                                                                                                                                        |
| Protein FAM40A                                          | Q5VSL9           | Y                     | Unknown                                 | NA                                                                                                                                                                                                        |
| Ras association domain-containing protein 6             | Q6ZTQ3           | N                     | Signal transduction                     | NA                                                                                                                                                                                                        |
| Sequestosome-1                                          | Q13501           | Y                     | Signal transduction                     | Phosphotyrosine-independent ligand for the Lck SH2 domain of 62 kDa, Ubiquitin-binding protein p62, EB13-associated protein of 60 kDa                                                                     |
| SH2 domain containing 3C isoform 1                      | Q8N5H7           | Y                     | Signal transduction                     | Novel SH2-containing protein 3                                                                                                                                                                            |
| Small acidic protein                                    | O00193           | Y                     | Unknown                                 | NA                                                                                                                                                                                                        |
| Solute carrier family 12, member 6, isoform a           | Q9UHW9           | Y                     | Ion transport                           | Electroneutral potassium chloride cotransporter 3, K-Cl cotransporter 3                                                                                                                                   |
| Sorting nexin-17                                        | Q15036           | Y                     | Trafficking*                            | NA                                                                                                                                                                                                        |
| Synaptojanin-170                                        | O43426           | Y                     | Metabolism                              | Synaptic inositol-1,4,5-trisphosphate 5-phosphatase 1                                                                                                                                                     |
| Tax1-binding protein 1, isoform 1 or 2                  | Q86VP1           | N                     | Signal transduction                     | TRAF6-binding protein                                                                                                                                                                                     |
| Tensin-3                                                | Q68CZ2           | Y                     | Cellular structure                      | Tumor endothelial marker 6, Tensin-like SH2 domain-containing protein 1                                                                                                                                   |
| Tetraspanin-10                                          | Q9H1Z9           | N                     | Unknown                                 | Oculospandin                                                                                                                                                                                              |
| TNFAIP3 interacting protein 1                           | Q15025           | Y                     | Signal regulation                       | Nef-associated factor 1, HIV-1 Nef-interacting protein, Virion-associated nuclear shuttling protein, Nip40-1                                                                                              |
| Transmembrane protein 184C                              | Q9NVA4           | N                     | Unknown                                 | Transmembrane protein 34                                                                                                                                                                                  |
| Tumor necrosis factor receptor superfamily member 8     | P28908           | N                     | Receptor/signal transduction            | CD30L receptor, Lymphocyte activation antigen CD30, KI-1 antigen, CD30                                                                                                                                    |
| UPF0492 protein C20orf94                                | Q5VYV7           | N                     | Unknown                                 | NA                                                                                                                                                                                                        |
| UPF0501 protein KIAA1430                                | Q9P2B7           | Y                     | Unknown                                 | NA                                                                                                                                                                                                        |
| UPF0555 protein KIAA0776                                | O94874           | Y                     | Unknown                                 | NA                                                                                                                                                                                                        |
| Xenotropic and polytropic retrovirus receptor 1         | Q9UBH6           | Y                     | Receptor/signal transduction            | Protein SYG1 homolog, Xenotropic and polytropic murine leukemia virus receptor X3                                                                                                                         |

NA, not applicable.

\*Hypothetical function.
